# Supplementary material for: Integrative Analysis of Single-Cell and Bulk RNA Sequencing Reveals Oxidative Stress Signatures for Prognostic and Therapeutic Prediction in Colorectal Cancer
Source: Research Square preprint supplement (doi:10.21203/rs.3.rs-6636674/v1), 2025-06-01
Supplement: Supplementary file 1 [file f7b6d3bc5d5f55dfec37987d.docx]

Table 2 Prognostic predictive power of Univariate and multivariate Cox analyses for OSRS based on TCGA

| Characteristics | Univariate analysis | |  | Multivariate analysis | |
| --- | --- | --- | --- | --- | --- |
| Hazard ratio (95% CI) | P value | Hazard ratio (95% CI) | P value |
| Age |  |  |  |  |  |
| <= 60 | Reference |  |  | Reference |  |
| > 60 | 1.75 (1.09 - 2.82) | **0.020** |  | 2.21 (1.35 – 3.61) | **0.002** |
| Gender |  |  |  |  |  |
| Female | Reference |  |  | Reference |  |
| Male | 1.00 (0.67 - 1.47) | 0.985 |  | 0.89 (0.60 - 1.33) | 0.576 |
| OSRSgroup |  |  |  |  |  |
| Low | Reference |  |  | Reference |  |
| High | 1.92 (1.29 - 2.88) | **0.001** |  | 1.69 (1.12 - 2.15) | **0.015** |
| Pathologic stage |  |  |  |  |  |
| Stage I | Reference |  |  | Reference |  |
| Stage II | 3.20 (0.96 – 10.59) | 0.057 |  | 3.06 (0.48 – 19.62) | 0.237 |
| Stage Ⅲ | 6.20 (1.89 – 20.29) | **0.003** |  | 14.52 (2.11 – 99.77) | **0.007** |
| Stage Ⅳ | 17.35 (5.37 – 56.12) | **＜0.001** |  | - |  |
| Pathologic T stage |  |  |  |  |  |
| T1 | Reference |  |  | Reference |  |
| T2 | 1.23 (0.14 – 10.54) | 0.851 |  | 0.50 (0.05 – 5.29) | 0.563 |
| T3 | 3.55 (0.49 – 25.59) | 0.208 |  | 0.52 (0.04 – 7.23) | 0.625 |
| T4 | 12.27 (1.65 – 91.05) | **0.014** |  | 1.08 (0.08 – 15.52) | 0.955 |
| Pathologic N stage |  |  |  |  |  |
| N0 | Reference |  |  | Reference |  |
| N1 | 2.09 (1.27 - 3.45) | **0.004** |  | 0.35 (0.12 - 0.97) | **0.044** |
| N2 | 4.64 (2.92 – 7.35) | **< 0.001** |  | 0.58 (0.21 – 1.63) | 0.303 |
| Pathologic M stage |  |  |  |  |  |
| M0 | Reference |  |  | Reference |  |
| M1 | 4.68 (3.12 – 7.01) | **< 0.001** |  | 31.01 (4.75 – 202.63) | **< 0.001** |
